# Supplementary material for: GOLM1 Drives Colorectal Cancer Metastasis by Regulating Myeloid-derived Suppressor Cells
Source: PubMed Central journal article supplement (PMC8558645; doi:10.7150/jca.61567), 2021-10-21
Supplement: jcav12p7158s1.pdf [file jcav12p7158s1.pdf]

1  
2  
3  
4  
5  
6  
7  
8  
9  
10  
11  
12  
13  
14  
15  
16  
17  
18

## Supplementary Materials

### **GOLM1 Drives Colorectal Cancer Metastasis by Regulating Myeloid-derived Suppressor Cells**

Yunzhi Dang<sup>✉</sup>, Jiao Yu, Shuhong Zhao, Long Jin, Ximing Cao, Qing Wang

Department of Radiation Oncology, Shaanxi Provincial People's Hospital, Xi'an, 710086, China

**Corresponding author:** Dr. Yunzhi Dang

Department of Radiation Oncology, Shaanxi Provincial People's Hospital, Xi'an 710086, China

Tel: +86-29-8525 2140

Email: [dangyunzhi@xjtu.edu.cn](mailto:dangyunzhi@xjtu.edu.cn)

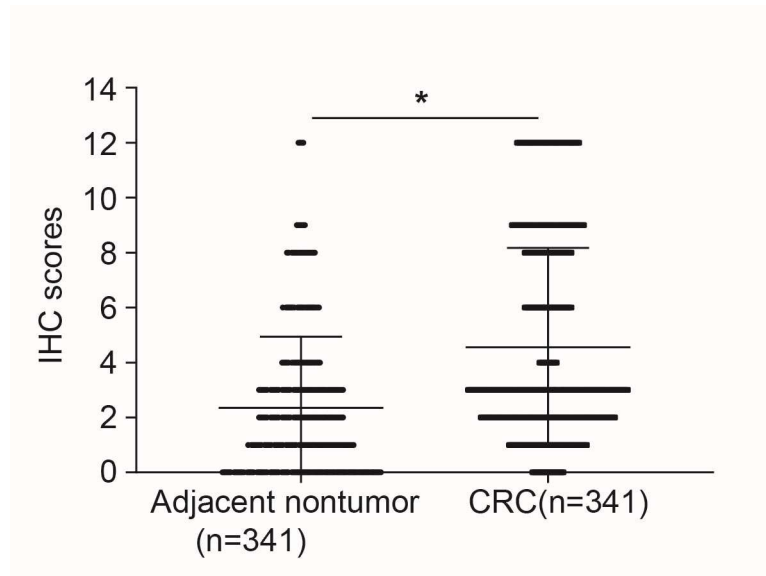

19

20 **Supplementary Figure 1. IHC scores of GOLM1 in human CRC tissues and**

21 **adjacent nontumor tissues.**

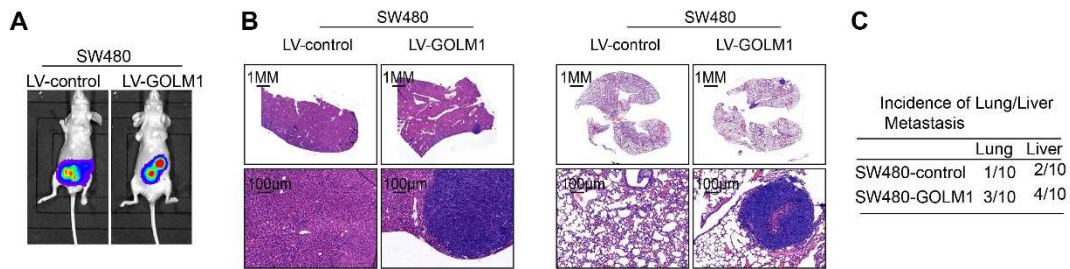

22

23 **Supplementary Figure 2. GOLM1 promotes CRC metastasis in nude mice.**

24 (A-B) Metastasis assays in the immune-deficiency nude mice. Bioluminescent

25 imaging(A), HE (B), and the incidence and number of lung and liver metastasis (C).

26
